# Supplementary material for: Construction of Anti-Counterfeiting Pattern On The Cellulose Film By In-Situ Regulation Strategies
Source: Research Square preprint supplement (doi:10.21203/rs.3.rs-1101859/v1), 2022-01-19
Supplement: Supplementary file 1 [file d9614c486dc306ce7ecc8f8e.docx]

Supporting Information

**Construction of anti-counterfeiting pattern on the cellulose film by in-situ regulation strategies**

Yidan Jin, Chengfeng Wu, Xiaomin Zhang*, Shengpei Su, and Jin Zhu

1 Key Laboratory of Chemical Biology and Traditional Chinese Medicine Research (Ministry of Education of China); The Key Lab for Fine Processing of Resources and Advanced Materials of Hunan Province; National & Local Joint Engineering Lab for New Petro-chemical Materials and Fine Utilization of Resources, Hunan Normal University, Changsha 410081, People’s Republic of China.

2 Key Laboratory of Bio-based Polymeric Materials, Ningbo Institute of Material Technology and Engineering, Chinese Academy of Sciences, Ningbo 315201, People’s Republic of China.

* Author to whom correspondence should be addressed. E-mail: [zhangxm@hunnu.edu.cn](mailto:zhangxm@hunnu.edu.cn)

Table of Contents

S1. Experimental section

Figure S1. Polarization microscopic (yellow) before washing and Stereo-microscope picture (green) after washing on the surface of cellulose membranes

Figure S2. Polarization microscopic (yellow) before washing and Stereo-microscope picture (green) after washing on the surface of cellulose membranes

Figure S3. The pattern evolution with the increasing of temperature

Figure S4. Schematic diagram of the growth process of LiCl crystal in DMAc solution

Figure S5. Polarization microscopic (yellow) before rinsing and Stereo-microscope picture (green) after rinsing on the surface of cellulose film

Figure S6. Collection of the fingerprint (a-c), collection of pattern information on the cellulose film(d-f), pattern information as security key (f-h)

Figure S7. Cyclic response performance of patterned cellulose film in room temperature (a) and range from -20~60℃

Table S1. The pattern at different conditions

Table S2. Height of ridge and width of between neighboring ridge at the range for different viscosity

Table S3. Height of ridge and width of between neighboring ridge of b6 film at the range for different temperature

Table S4. Average response time in every season of one year


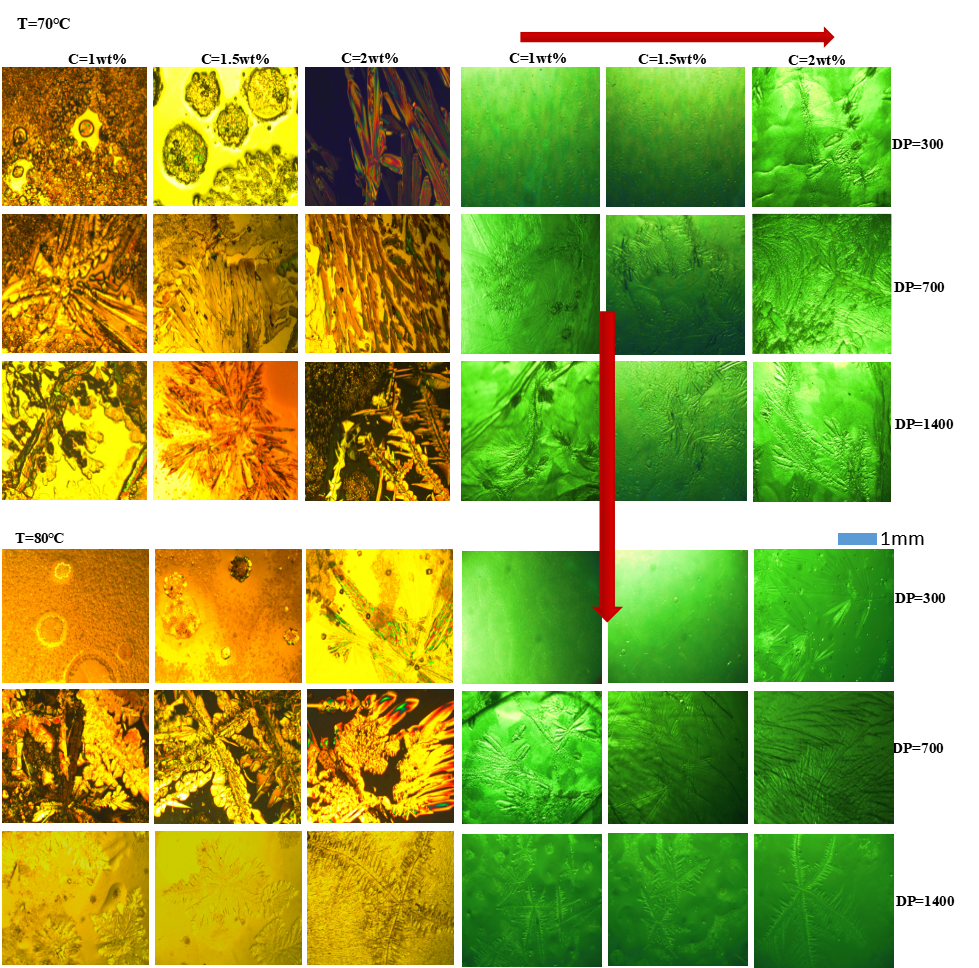


**Figure S1.** Polarization microscopic (yellow) before washing and Stereo-microscope picture (green) after washing on the surface of cellulose membranes at 70℃, 80℃，concentration for 1 wt%, 1.5 wt% and 2.0

wt%, DP for 300, 700 and 1400. Stand for 1mm.


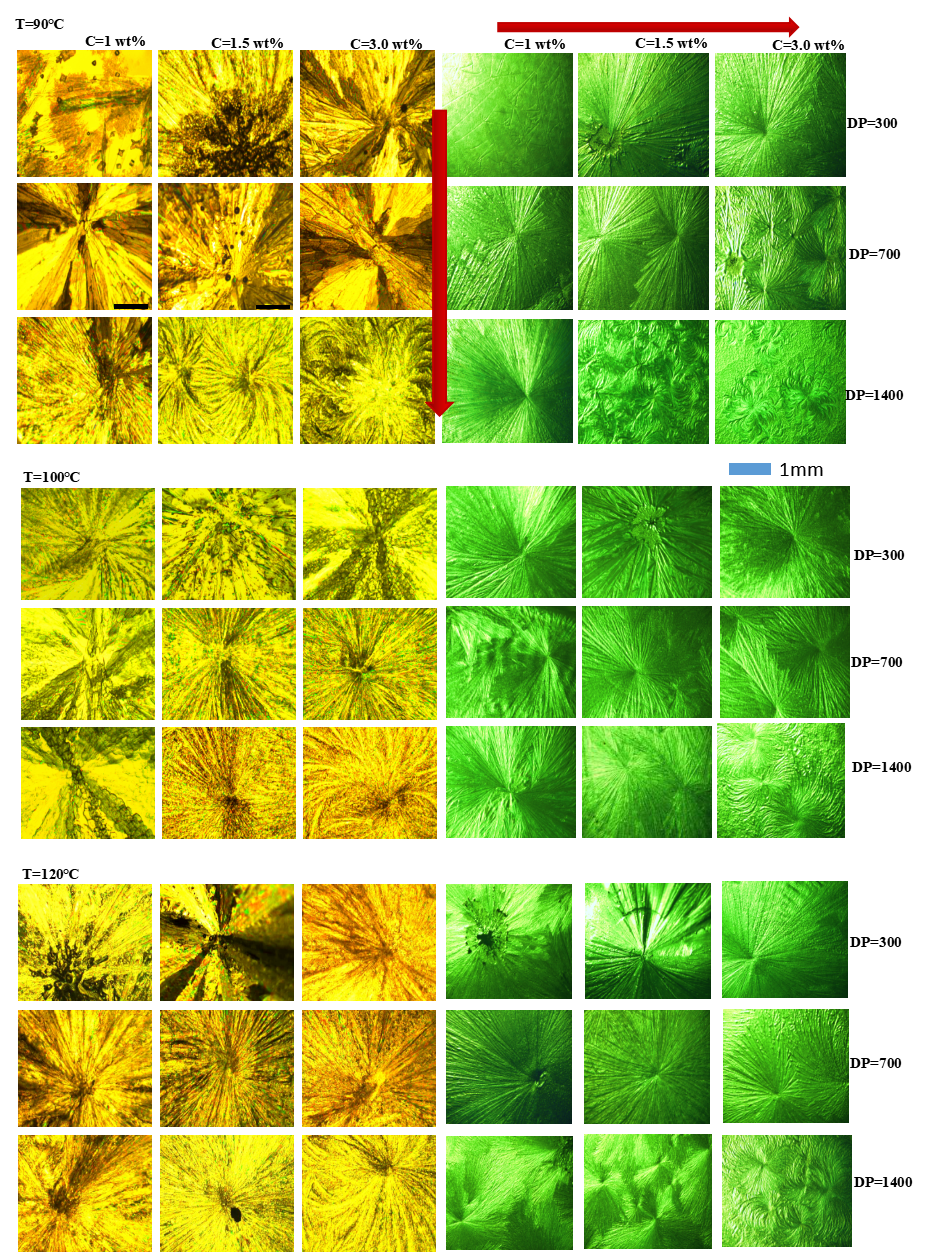


**Figure S2.** Polarization microscopic (yellow) before washing and Stereo-microscope picture (green) after washing on the surface of cellulose membranes at 70℃, 80℃，concentration for 1 wt%, 1.5 wt% and 2.0 wt%, DP for 300, 700 and 1400. Stand for 1mm.


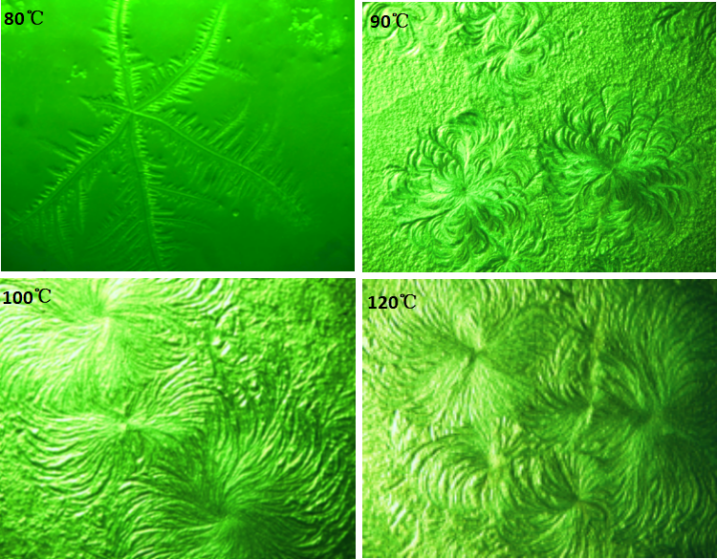
**Figure S3.** The pattern evolution with the increasing of temperature stand for 500um.


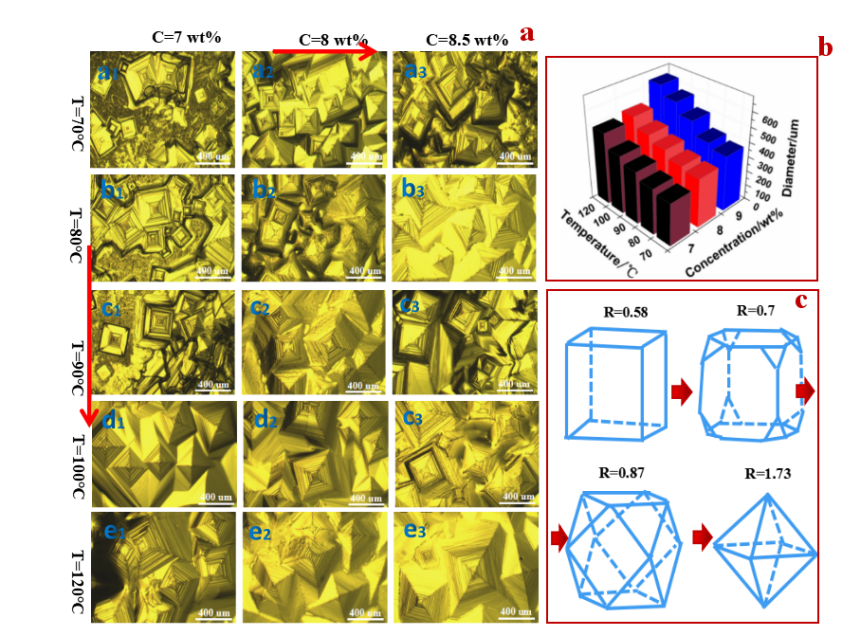


**Figure S4.** Schematic diagram of the growth process of LiCl crystal in DMAc solution.


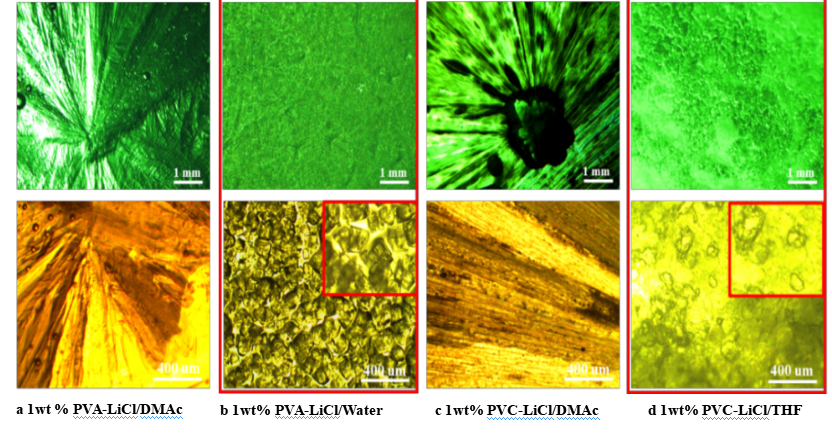


**Figure S5.** Polarization microscopic (yellow) before rinsing and Stereo-microscope picture (green) after rinsing on the surface of cellulose film at 100 ºC from different solvent systems including LiCl/Water, LiCl/THF, LiCl/THF.


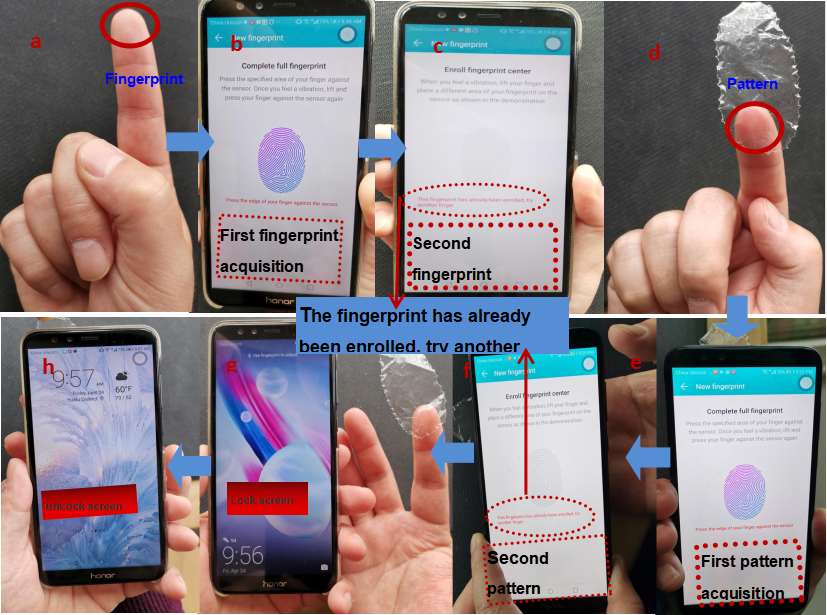


**Figure S6.** Collection of fingerprint (a-c), collection of pattern information on the cellulose film(d-f), pattern information as security key (f-h)

**a**

**b**

**Figure S7.** Cyclic response performance as security key of patterned cellulose film in room temperature (a) and range from -20~60℃ (b)

**Table S1.** The pattern at different conditions.

| DP[a] | C (wt%) [b] | T (ºC) [c] | Ƞ (Pa.s) [d] | Shape |
| --- | --- | --- | --- | --- |
| 300 | 1 | 70/80 | 0.86/0.54 | Circular |
|  | 1 | 90/100/120 | 0.12/0.031/0.026 | Dendritic/Divergent |
|  | 1.5 | 70/80 | 1.38/1.31 | Circular |
|  | 1.5 | 90/100/120 | 1.26/1.04/0.92 | Divergent |
|  | 2 | 70/80 | 2.89/2.42 | Dendritic |
|  | 2 | 90/100/120 | 2.16/2.02/1.53 | Divergent |
| 700 | 1/1.5/2 | 70/80 | 9.35≤ | Dendritic |
|  | 1/1.5/2 | 90/100/120 | 7.94≤ | Divergent |
| 1400 | 1 | 70/80 | 6.84/5.67 | Dendritic |
|  | 1 | 90/100/120 | 4.12/3.97/3.05 | Divergent |
|  | 1.5 | 70/80 | 13.24/12.65 | Dendritic |
|  | 1.5 | 90 | 11.81 | Daisy-like |
|  | 1.5 | 100/120 | 10.98/9.94 | Divergent |
|  | 2 | 70/80 | 22.84/26.40 | Dendritic |
|  | 2 | 90/100/120 | 20.60/18.65/15.64 | Daisy-like |

[a] Degree of polymerization. [b] Concentration. [c] Temperature. [d] Viscosity.

**Table S2.** Height of ridge and width of between neighbouring ridge at the range for different viscosity

| Sample | b1 | | b2 | | b3 | | b4 | | b5 | | b6 | |
| --- | --- | --- | --- | --- | --- | --- | --- | --- | --- | --- | --- | --- |
| Viscosity (Pa.s) | 2.64 | | 5.32 | | 8.65 | | 7.64 | | 12.36 | | 20.60 | |
| Height of ridge(um) | 1 | 2 | 1 | 2 | 1 | 2 | 1 | 2 | 1 | 2 | 1 | 2 |
| 2±0.2 | 14±2 | 4±0.2 | 21±2 | 6±0.5 | 27±2 | 5±0.3 | 25±2 | 8±1 | 30±1 | 10±2 | 33±1 |
| Width neighboring ridge | 55 | 140 | 94 | 220 | 174 | 352 | 128 | 286 | 200 | 400 | 306 | 430 |

**Table S3.** Height of ridge and width of between neighbouring ridge of b6 film at the range for different temperature

| Sample | b6 ( DP = 1400, Concentration for 2 wt. %) | | | | | | | |
| --- | --- | --- | --- | --- | --- | --- | --- | --- |
| Temperature (ºC) | 80 | | 90 | | 100 | | 120 | |
| Viscosity (Pa.s) | 26.40 | | 20.60 | | 18.65 | | 15.64 | |
| Height of ridge (um) | 1 | 2 | 1 | 2 | 1 | 2 | 1 | 2 |
| 1±0.2 | 8±0.3 | 4±0.2 | 21±2 | 7±0.5 | 24±2 | 9±0.3 | 23±2 |
| Width of neighboring ridge | 10 | 50 | 94 | 220 | 86 | 180 | 54 | 120 |

**Table S4.** Average response time in every season of one year

| Season | Spring | Summer | Autumn | Winter |
| --- | --- | --- | --- | --- |
| Response time ( t )[a] | 0.44s | 0.45s | 0.47s | 0.44s |

# [a]:Take ten times/month and take the average value of one season
